# Supplementary material for: Expanding medicinal chemistry into 3D space: metallofragments as 3D scaffolds for fragment-based drug discovery
Source: Royal Society of Chemistry journal article supplement (doi:10.1039/c9sc05586j), 2019-12-12
Supplement: c9sc05586j2.pdf [file c9sc05586j2.pdf]

# Metallofragments as 3D Scaffolds for Fragment-Based Drug Discovery

Fragment-based drug discovery (FBDD) is a successful strategy for the discovery of small molecule therapeutics

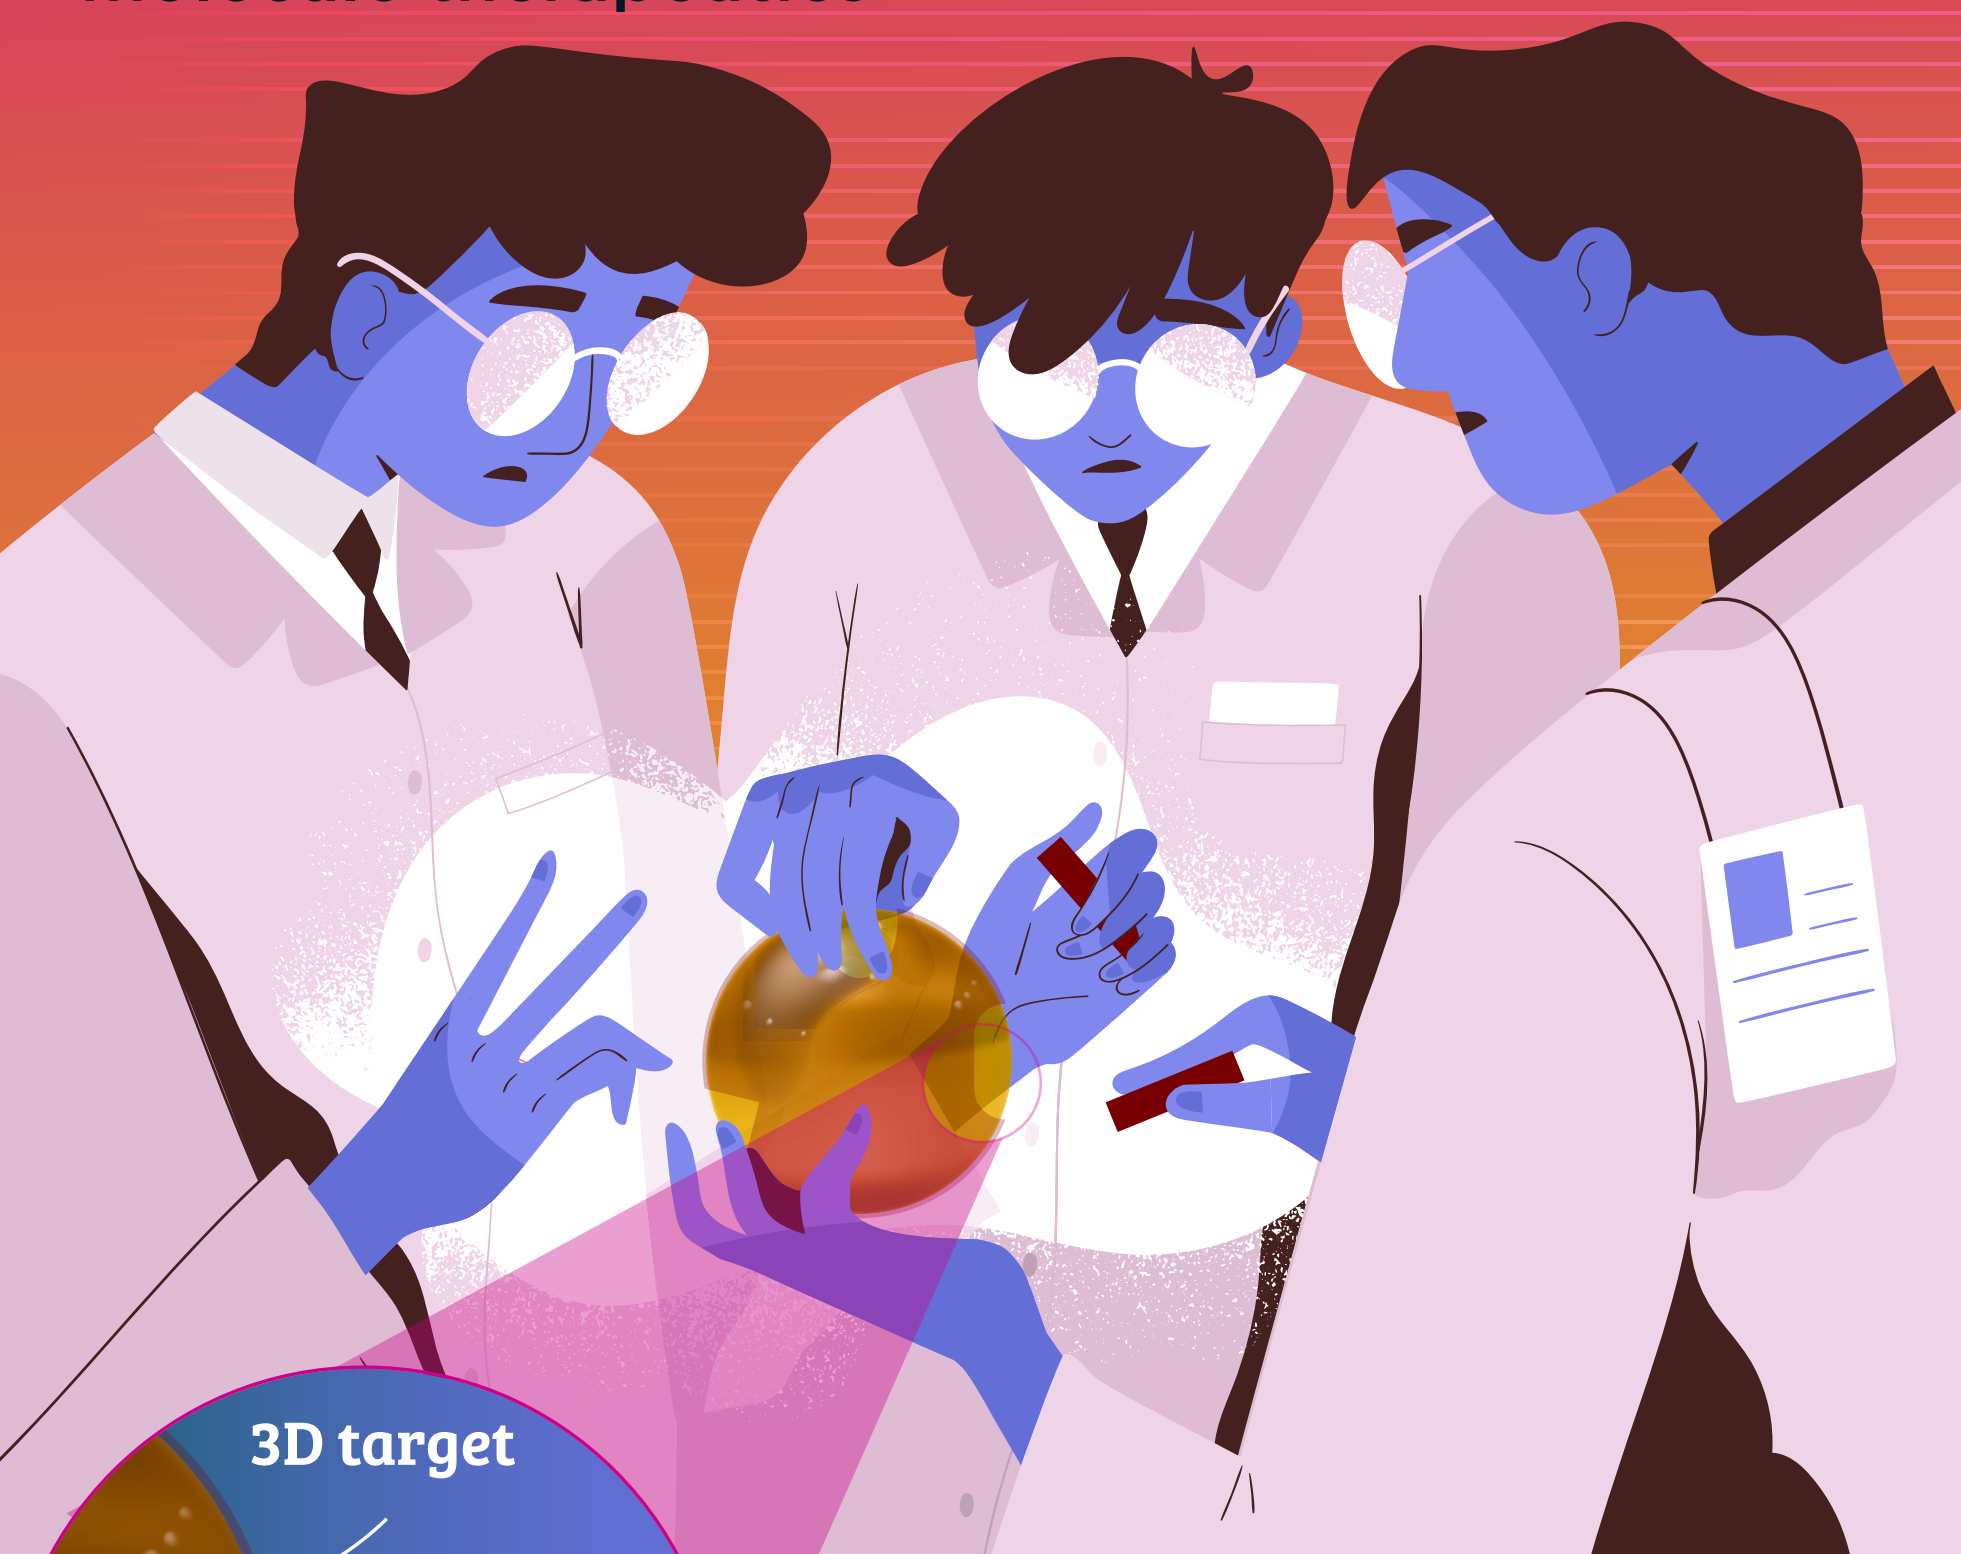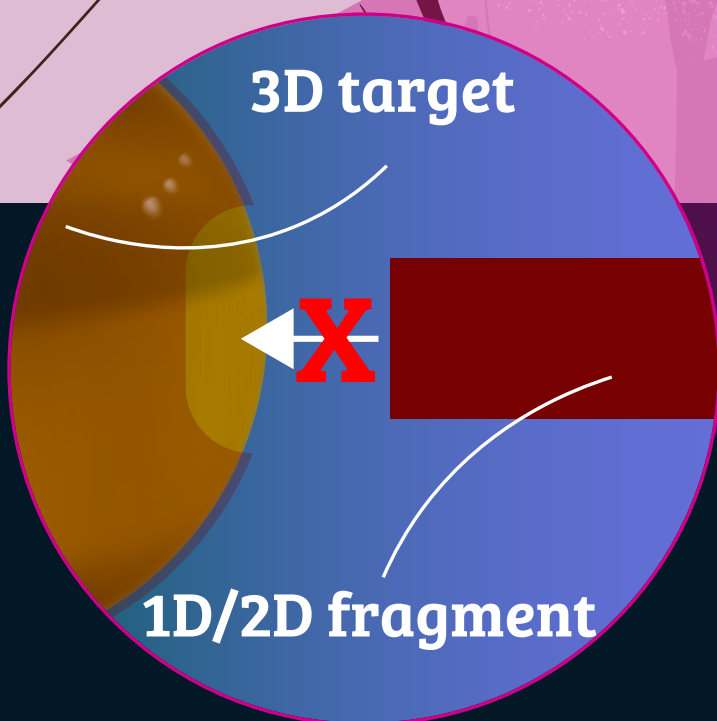

However, the linear (1D) or planar (2D) shape of organic fragments limits a more complete exploration of chemical shape for target protein binding

Inert metal complexes or metallofragments (mFs) can be used to construct 3D fragment libraries

An mF library with 13 classes of metal complexes was designed, synthesized, and characterized

mF library of 71 molecules

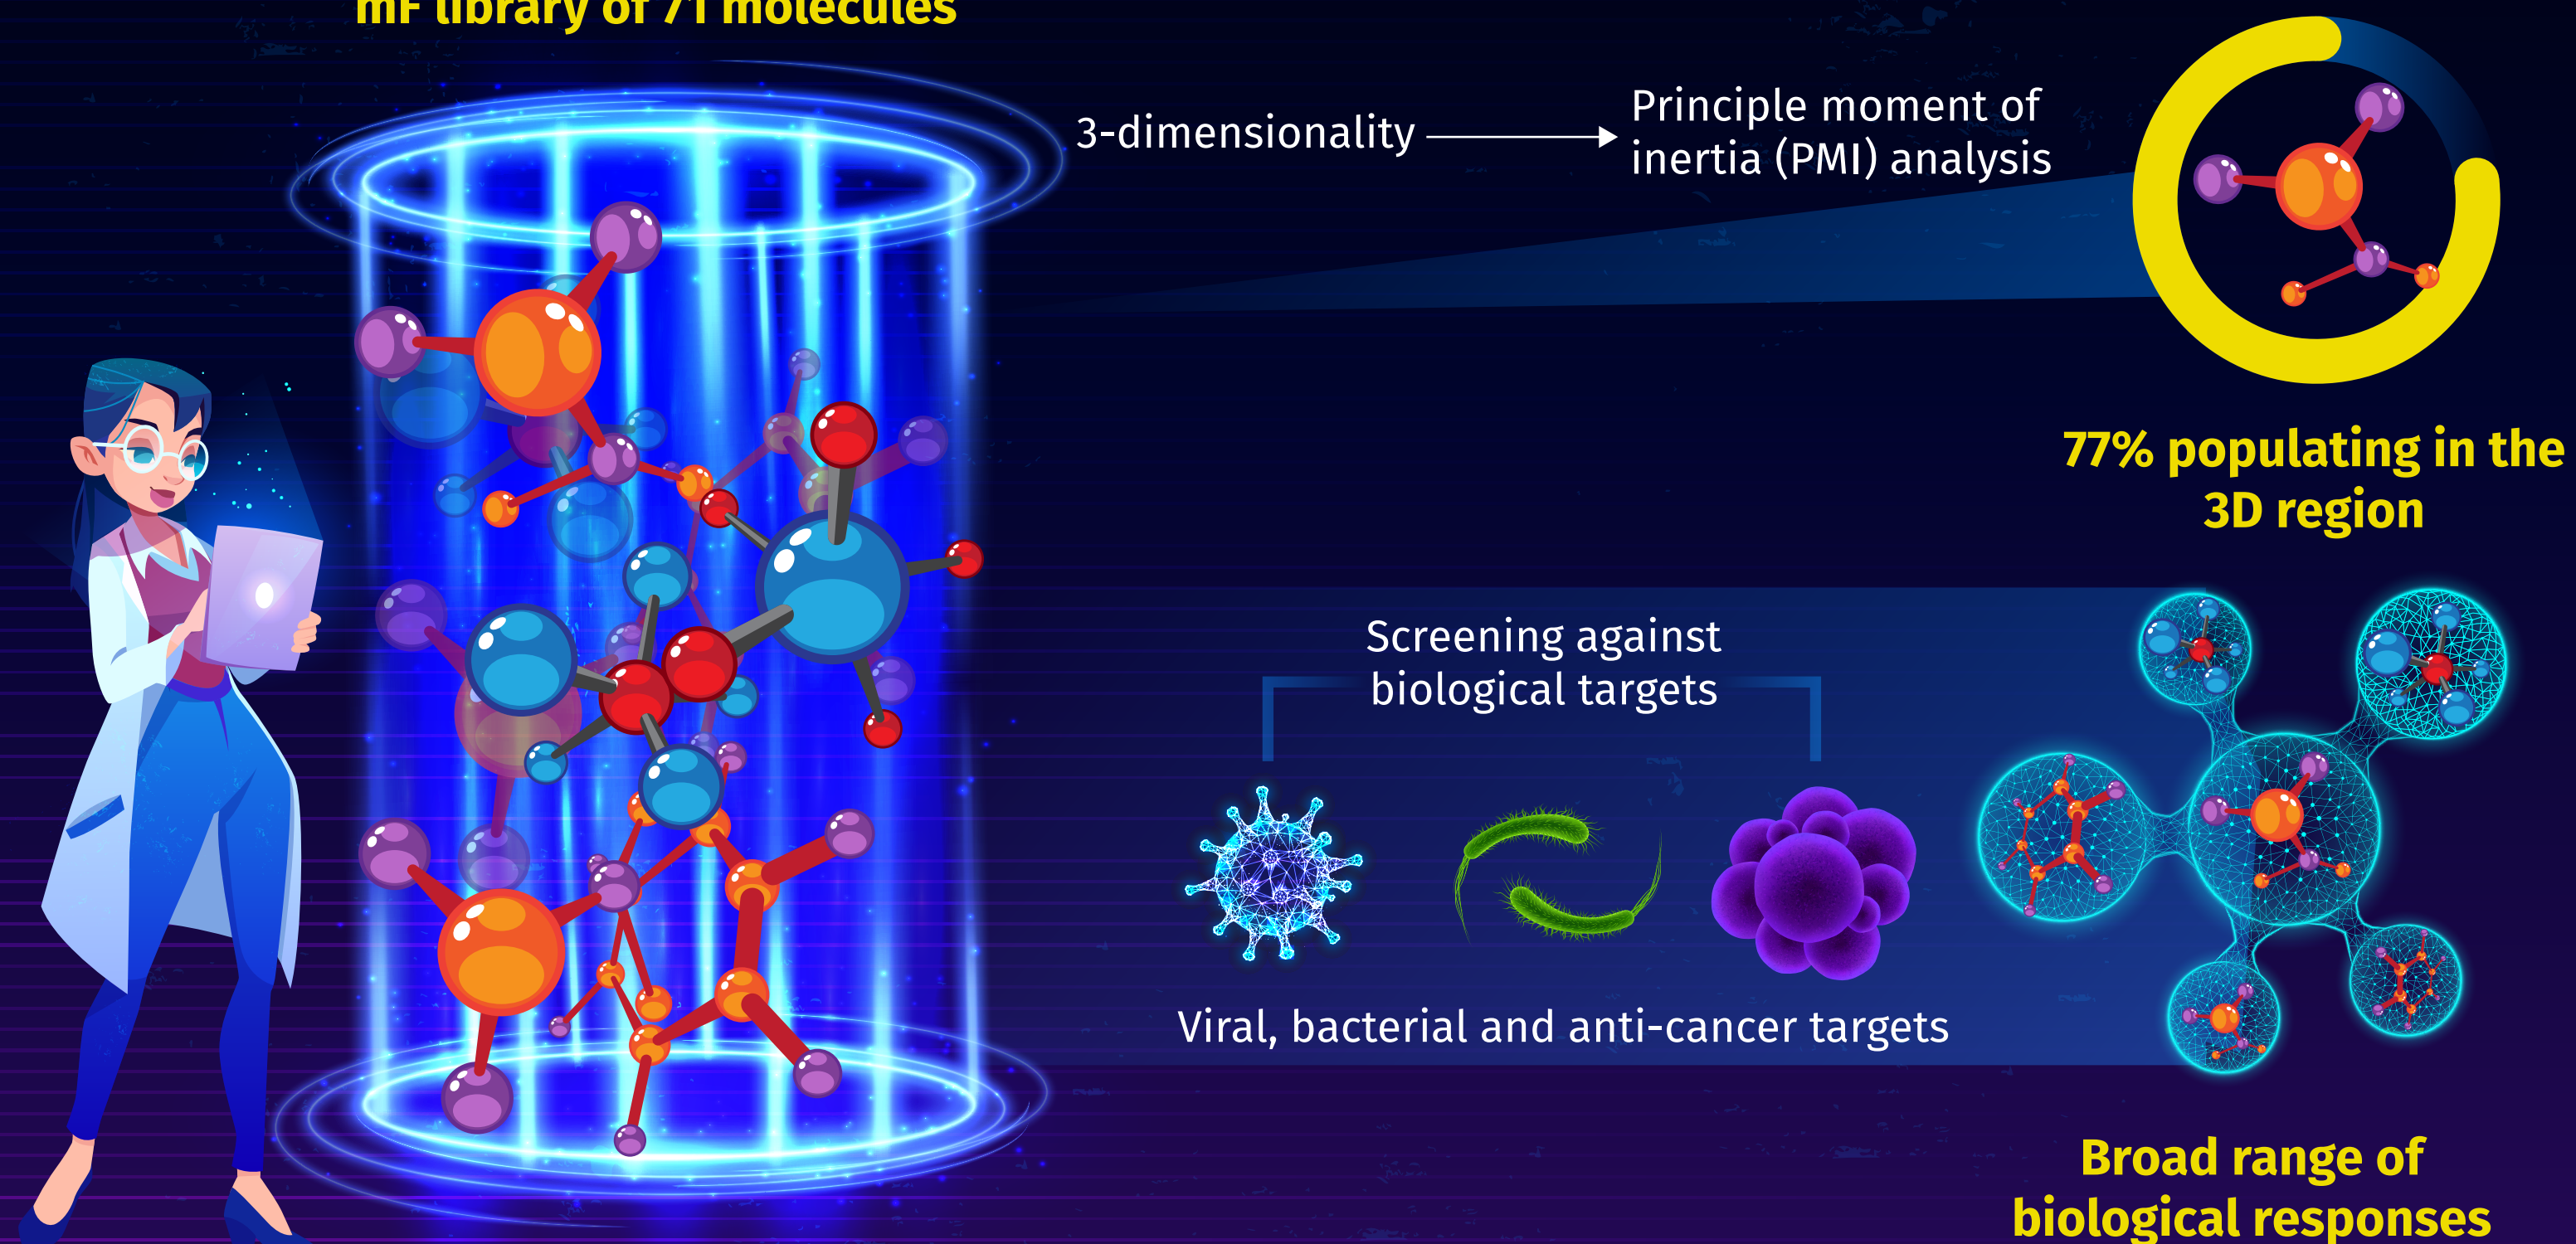

mF libraries access underutilized 3D fragment space for FBDD against a variety of protein targets, which could lead to new opportunities in drug discovery

Chemical  
Science

PICK  
OF THE  
WEEK

Expanding Medicinal Chemistry into 3D Space: Metallofragments as 3D Scaffolds for Fragment-Based Drug Discovery

Cohen *et al.* (2020) | DOI: 10.1039/C9SC05586J

ROYAL SOCIETY  
OF CHEMISTRY
